## CORRESPONDENCE

come to issue certificates of special expertise in critical care medicine and pain management, it makes sense to many of us to consider a name for the parent specialty that is broader, more descriptive, and more accurate than "anesthesiology." In this vein, the suggestion of "metesthesiology" was forwarded to properly emphasize our role in altering (going "above and beyond") rather than eliminating the body's perception of noxious stimuli.<sup>2</sup> I was impressed by Saidman's arguments for a term not previously suggested: "perioperative medicine and pain management." This name emphasizes: (1) our specialty as a practice of medicine, (2) our role in guiding the patient safely through the totality of an invasive or painful procedure, and (3) our dramatic advances in the comprehensive treatment of pain from any cause.

Listening to Saidman's lecture and later reading the text, I was struck by the thought that there could not be a better way to initiate and lead such a change than by renaming our Journal. Obviously, such a change cannot be considered lightly and would require discussion and consensus among the Editorial Board of the Journal and the membership of the American Society of Anesthesiologists. If the name "perioperative medicine and pain management" is considered to better reflect the scope of our practice, does it not also better reflect the breadth of clinical and laboratory investigations that interest the readers of our Journal? An important part of the purpose of the American Society of Anesthesiologists as written in the Society's Bylaws is "to develop and further the specialty of anesthesiology."

Anesthesiology  
83:1133, 1995  
© 1995 American Society of Anesthesiologists, Inc.  
Lippincott-Raven Publishers

*In Reply:*—I appreciate McLoughlin's generous comments regarding the 1994 Rovenstine Lecture. Obviously, I agree with his suggestions *vis a vis* renaming the specialty but am less convinced that renaming the Journal would be appropriate. Although "perioperative medicine and pain management" may more precisely define our clinical job description, such a term does not begin to define the breadth of our anesthesia research—especially that concerned with basic science. How, for example, would research involving complex subcellular physiology and biochemistry, molecular genetics, magnetic resonance imaging, or theoretical modeling fit in a journal

Anesthesiology  
83:1133-1134, 1995  
© 1995 American Society of Anesthesiologists, Inc.  
Lippincott-Raven Publishers

## Another Simple Method for Ring Removal

*To the Editor:*—Rings on the fingers of surgical patients usually should be removed preoperatively. Although rings frequently can be removed by thorough lubrication around the ring or the string-wrap method,<sup>1,2</sup> sometimes we are unable to remove rings using these methods, and, in an emergency, it is necessary to use a ring cutter. We would like to introduce a new simple method for ring removal.

ANESTHESIOLOGY is the Journal of the American Society of Anesthesiologists. Discussion about whether the name of our specialty should change and hence Saidman's specific suggestion of "perioperative medicine and pain management" have arisen because of the growth and development of our specialty. I like the name, as do many with whom I speak. Is it time for a change?

**Thomas M. McLoughlin, Jr., M.D.**  
Assistant Professor  
Department of Anesthesiology  
Uniformed Services University of the Health Sciences  
Walter Reed Army Medical Center  
Washington, D.C. 20307

## References

1. Saidman LJ: The 33rd Rovenstine Lecture: What I have learned from 9 years and 9,000 papers. ANESTHESIOLOGY 83:191-197, 1995
2. Greene NM: The 31st Rovenstine Lecture: The changing horizons in anesthesiology. ANESTHESIOLOGY 79:164-170, 1993

(Accepted for publication August 11, 1995.)

named "Perioperative Medicine and Pain Management"? Thus, because I agree that the specialty is, to some extent, constrained by its name, I would concentrate on renaming the specialty now and leave the Journal title unchanged until a term better describing the breadth of its contents can be agreed on.

**Lawrence J. Saidman, M.D.**  
Editor in Chief

(Accepted for publication August 11, 1995.)

A finger part of a surgical glove cut off cylindrically is passed between the ring and the finger using small forceps as used for plastic surgery (fig. 1). The segment of the rubber beyond the ring is turned inside out and is pulled toward the fingertip with a twisting motion on the ring (fig. 2), thereby removing it.

This method has the advantage over the string-wrap method, which

## CORRESPONDENCE

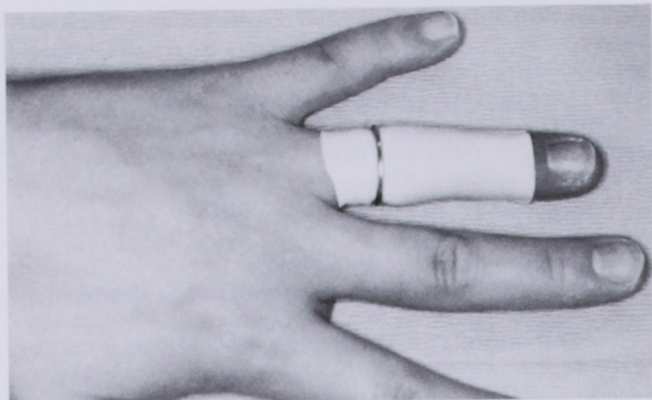

Fig. 1. A finger part of a surgical glove is passed between the ring and the finger.

cannot be applied to burned, wounded, fractured, or inflamed fingers because of severe pain and the possibility of causing further damage to these fingers.<sup>1,2</sup> The digital nerves can be blocked, if necessary. In addition, the glove between the ring and the finger may protect the finger against electrical burn during surgery even if removal of the ring was not possible. With this method, we successfully managed five patients whose rings could not be removed either with lubrication using lidocaine lubricant or olive oil and the string-wrap method. We believe that our method is an alternative worth trying before the ring is cut.

**Soichiro Inoue, M.D.**  
Senior Resident of Anesthesiology  
**Satoshi Akazawa, M.D.**  
Associate Professor of Anesthesiology  
**Hirokazu Fukuda, M.D.**  
Instructor of Anesthesiology

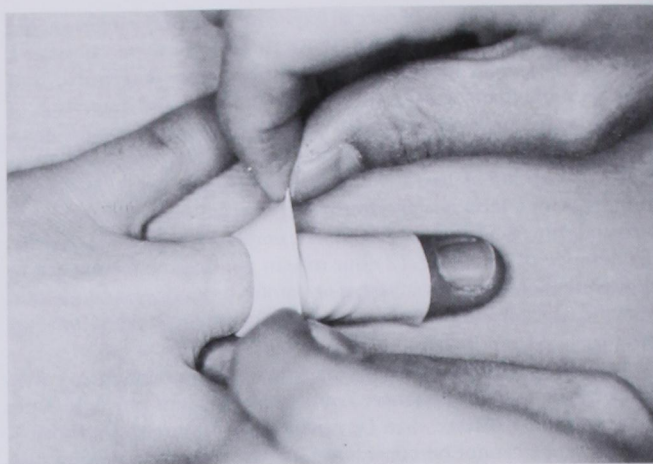

Fig. 2. The segment of the rubber beyond the ring is turned inside out and is pulled toward the fingertip.

**Reiju Shimizu, M.D.**  
Professor and Chairman of Anesthesiology  
Department of Anesthesiology  
Jichi Medical School  
Minamikawachi-machi, Kawachi-gun  
Tochigi-ken, 329-04, Japan

## References

1. Barnett RC: Soft tissue foreign body removal, *Clinical Procedure in Emergency Medicine*. Edited by Roberts JR, Hedges JR. Philadelphia, WB Saunders, 1993, pp 588-590
2. Mizrai S, Lunski I: A simplified method for ring removal from an edematous finger. *Am J Surg* 151:412-413, 1986

(Accepted for publication August 17, 1995.)

STATEMENT OF OWNERSHIP, MANAGEMENT AND CIRCULATION (Act of August 12, 1970: Section 3685, Title 39 United States Code) Date of Filing—October 1, 1995, Title of Publication—Anesthesiology; Frequency of Issue—Monthly; Annual Subscription Price—\$130.00; Location of Known Office of Publication—12107 Insurance Way, Suite 114, Hagerstown, MD 21740; Location of the Headquarters or General Business Offices of the Publisher—Lippincott-Raven Publishers, 227 East Washington Square, Philadelphia, PA 19106; Publisher—American Society of Anesthesiologists, Inc., 520 North Northwest Highway, Park Ridge, IL 60068-2573; Editor—Lawrence J. Saidman, M.D., Anesthesiology, 0815, University of California—San Diego, 9500 Gilman Drive, La Jolla, CA 92093-0815; Managing Editor—Elizabeth Varga, 227 East Washington Square, Philadelphia, PA 19106; Owner—American Society of Anesthesiologists, Inc., 520 North Northwest Highway, Park Ridge, IL 60068-2573; Known Bondholders, Mortgagees, and other security holders owning or holding 1 percent or more of total amount of bonds, mortgages, or other securities—None. A. Total no. copies printed (*net press run*), average 42,338, actual 42,000; B. Paid circulation 1. Sales through dealers and carriers, street vendors and counter sales, average none, actual none; 2. Mail subscriptions, average 38,990, actual 38,187; C. Total paid circulation, average 38,900, actual 38,187; D. Free distribution by mail, carrier or other means. Samples, complimentary, and other free copies, average 560, actual 532. E. Total distribution (*sum of C and D*), average 39,550, actual 38,719; F. Copies not distributed 1. Office use, leftover, unaccounted, spoiled after printing, average 2,788, actual 3,281, 2. Returns from news agents, none; G. Total (*sum of E & F—should equal net press runs shown in A*), average 42,338, actual 42,000. I certify that the statements made by me above are correct and complete. Virginia B. Martin, *Vice President, Operations*.
